# Supplementary material for: Spatial and Temporal Adaptations of Lowland Tapirs (Tapirus terrestris) to Environmental and Anthropogenic Impacts
Source: Life (Basel). 2022 Dec 25;13(1):66. doi: 10.3390/life13010066 (PMC9866631; doi:10.3390/life13010066)
Supplement: Supplementary file 1 [file life-13-00066-s001.zip]

Archive with 4 entries (4 files):
- FigS1_camera trap records of Tapirus terrestris.jpg
- supplMat_tables_fig_legends.pdf
- suppl_tableS1.xlsx
- suppl_tableS2.xlsx
