# Supplementary material for: Spatial and Temporal Adaptations of Lowland Tapirs (Tapirus terrestris) to Environmental and Anthropogenic Impacts
Source: Life (Basel). 2022 Dec 25;13(1):66. doi: 10.3390/life13010066 (PMC9866631; doi:10.3390/life13010066)
Supplement: Supplementary file 1 [file life-13-00066-s001.zip › suppl_tableS1.xlsx]

## Sheet: TableS1
Factor	Estimate	SE	CI
SESC
(intercept)	-3.5371	0.168073	(-3.867, -3.208)
habitat savanna	-0.468559	0.185102	(-0.831, -0.106)
settlement	0.483839	0.2085	(0.075, 0.893)
tourism	-0.216052	0.218152	(-0.644, 0.212)
freshwater	-0.201989	0.206278	(-0.606, 0.202)
period rainy	0.001328	0.032995	(-0.063, 0.066)
cattle yes	0.001314	0.056552	(-0.110, 0.112)
FBA
(intercept)	-3.51345	0.143489	(-3.795, 3.232)
cattle yes	0.128298	0.1386	(-0.143, 0.400)
habitat savanna	-0.105796	0.125991	(-0.353, 0.141)
period rainy	0.0170922	0.0583328	(-0.097, 0.131)
settlement	0.0105978	0.0452026	(-0.078, 0.099)
tourism	-0.002392	0.026285	(-0.054, 0.049)
saltwater	0.001798	0.0243523	(-0.046, 0.050)
freshwater	-0.0008526	0.0232438	(-0.046, 0.045)
