# Supplementary material for: Spatial and Temporal Adaptations of Lowland Tapirs (Tapirus terrestris) to Environmental and Anthropogenic Impacts
Source: Life (Basel). 2022 Dec 25;13(1):66. doi: 10.3390/life13010066 (PMC9866631; doi:10.3390/life13010066)
Supplement: Supplementary file 1 [file life-13-00066-s001.zip › suppl_tableS2.xlsx]

## Sheet: TableS2
(A)
Factor	Estimate	SE	CI
SESC
(intercept)	2.77067	0.41391	(1.957, 3.585)
cattle yes	0.83384	0.29055	(0.262, 1.405)
period rainy	1.03025	0.28965	(0.461, 1.60)
freshwater	-0.04021	0.15431	(-0.344, 0.263)
FBA
(intercept)	7.63983	1.18384	(5.311, 9.969)
habitat savanna	0.21034	0.44675	(-0.667, 1.088)
cattle yes	0.09685	0.31382	(-0.519, 0.713)
period rainy	0.21824	0.59015	(-0.941, 1.378)
freshwater	-0.01603	0.17572	(-0.362, 0.330)
(B)
Factor	Estimate	SE	CI
SESC
(intercept)	0.468559	0.133482	(0.206, 0.731)
settlement	0.358064	0.286702	(-0.205, 0.921)
tourism	-0.248297	0.260858	(-0.761, 0.264)
cattle yes	-0.021731	0.082047	(-0.183, 0.139)
freshwater	-0.03635	0.094343	(-0.222, 0.149)
period rainy	0.008997	0.054201	(-0.098, 0.116)
FBA
(intercept)	-0.179229	0.15339	(-0.481, 0.123)
cattle yes	-0.214263	0.21185	(-0.630, 0.202)
habitat savanna	0.072395	0.149119	(-0.221, 0.365)
settlement	0.070494	0.133055	(-0.191, 0.332)
tourism	0.043459	0.102249	(-0.158, 0.244)
saltwater	-0.005002	0.040116	(-0.084, 0.074)
(C)
Factor	Estimate	SE	CI
SESC
(intercept)	0.616545	0.156644	(0.308, 0.925)
habitat savanna	0.131445	0.179473	(-0.221, 0.484)
period rainy	0.24985	0.173816	(-0.092, 0.591)
cattle yes	0.035658	0.103394	(-0.167, 0.239)
settlement	0.028813	0.09203	(-0.152, 0.210)
freshwater	-0.009862	0.053576	(-0.115, 0.095)
FBA
(intercept)	-0.051024	0.154116	(-0.354, 0.252)
period rainy	0.067177	0.129423	(-0.187, 0.321)
settlement	0.036379	0.092065	(-0.145, 0.217)
tourism	0.015367	0.060649	(-0.104, 0.135)
cattle yes	-0.084686	0.149887	(-0.379, 0.210)
habitat savanna	0.050594	0.120721	(-0.186, 0.288)
freshwater	0.003784	0.033761	(-0.063, 0.070)
